# Supplementary material for: Comparative Efficacy of Teclistamab Versus Current Treatments in Real-World Clinical Practice in the Prospective LocoMMotion Study in Patients with Triple-Class-Exposed Relapsed and/or Refractory Multiple Myeloma
Source: Springer Nature journal article supplement (doi:10.1007/s12325-023-02480-7), 2023-03-24
Supplement: MOESM1 [file 24672096]

## **SUPPLEMENTARY MATERIAL**

### **Comparative Efficacy of Teclistamab Versus Current Treatments in Real-world Clinical Practice in the Prospective LocoMMotion Study in Patients with Triple-Class–Exposed Relapsed and/or Refractory Multiple Myeloma**

Philippe Moreau<sup>1</sup>, Niels W. C. J. van de Donk<sup>2</sup>, Michel Delforge<sup>3</sup>, Hermann Einsele<sup>4</sup>, Valerio De Stefano<sup>5</sup>, Aurore Perrot<sup>6</sup>, Britta Besemer<sup>7</sup>, Charlotte Pawlyn<sup>8</sup>, Lionel Karlin<sup>9</sup>, Salomon Manier<sup>10</sup>, Xavier Leleu<sup>11</sup>, Katja Weisel<sup>12</sup>, Francesca Ghilotti<sup>13</sup>, Joris Diels<sup>14</sup>, Ahmed Elsada<sup>15</sup>, Raul Morano<sup>16</sup>, Vadim Strulev<sup>14</sup>, Lixia Pei<sup>17</sup>, Rachel Kobos<sup>17</sup>, Jennifer Smit<sup>18</sup>, Mary Slavcev<sup>19</sup>, Maria-Victoria Mateos<sup>20</sup>

<sup>1</sup>Hematology Clinic, University Hospital Hôtel-Dieu, Nantes, France; <sup>2</sup>Department of Hematology, Amsterdam University Medical Center, Vrije Universiteit Amsterdam, Amsterdam, the Netherlands; <sup>3</sup>University of Leuven, Leuven, Belgium;

<sup>4</sup>Universitätsklinikum Würzburg, Medizinische Klinik und Poliklinik II, Würzburg, Germany; <sup>5</sup>Section of Hematology, Catholic University, Fondazione Policlinico A. Gemelli, IRCCS, Rome, Italy; <sup>6</sup>Service d'Hématologie, Centre Hospitalier Universitaire de Toulouse, Toulouse, France; <sup>7</sup>University of Tübingen, Tübingen, Germany; <sup>8</sup>The Institute of Cancer Research, London, UK; <sup>9</sup>Centre Hospitalier Lyon Sud, France; <sup>10</sup>University of Lille, Lille, France; <sup>11</sup>CHU and University, Poitiers, France; <sup>12</sup>University Medical Center Hamburg-Eppendorf, Hamburg, Germany; <sup>13</sup>Janssen-Cilag SpA, Cologno Monzese, Italy; <sup>14</sup>Janssen Pharmaceutica NV, Beerse, Belgium; <sup>15</sup>Janssen-Cilag, High Wycombe, Buckinghamshire, UK; <sup>16</sup>Janssen EMEA, Madrid, Spain;

<sup>17</sup>Janssen Research & Development, Raritan, NJ, USA; <sup>18</sup>Janssen Research & Development, Spring House, PA, USA; <sup>19</sup>Janssen Global Services, LLC, Raritan, NJ, USA; <sup>20</sup>University Hospital of Salamanca/IBSAL, CIC, Salamanca, Spain

**Corresponding Author:**

Maria-Victoria Mateos

Hospital Universitario de Salamanca

Departamento de Hematología

Paseo de la Transición S/N, 37007. Salamanca

Castilla y León

Spain.

Email: [mvmateos@usal.es](mailto:mvmateos@usal.es)

**Appendix S1** Data sources, study designs, and analysis methods

**Fig. S1** Propensity score distributions and standardized mean difference plots

**Table S1** Ethics committees/Institutional Review Boards in LocoMMotion

**Table S2** Ethics committees/Institutional Review Boards in MajesTEC-1

**Table S3** Treatment regimens, LocoMMotion cohort

## **Appendix S1** Data sources, study designs, and analysis methods

### **Data Sources**

#### ***Patients Treated with Teclistamab in MajesTEC-1***

MajesTEC-1 is an open-label, single-arm phase 1b/2 clinical trial studying the safety and efficacy of teclistamab in adult patients with triple-class–exposed relapsed/refractory multiple myeloma (RRMM) [1]. Eligible patients must have received a diagnosis of MM under International Myeloma Working Group diagnostic criteria and have had previous exposure to  $\geq 1$  proteasome inhibitor, 1 immunomodulatory inhibitor, and 1 anti-CD38 monoclonal antibody. This study consists of 3 distinct parts, registered as 2 unique clinical trials: parts 1 and 2 represent the phase 1 portion of the study (NCT03145181), and part 3 represents the phase 2 portion of the study (NCT04557098). The phase 1 portion assessed dose escalation and expansion of teclistamab, whereas the phase 2 portion examined efficacy. Patients in phase 1 were treated with intravenous or subcutaneous (SC) teclistamab, with doses ranging from 0.3 to 720  $\mu\text{g}/\text{kg}$  and 80 to 3000  $\mu\text{g}/\text{kg}$ , respectively. The recommended phase 2 dose (RP2D) was determined to be teclistamab 1.5 mg/kg SC, and 40 patients from phase 1 received this dose. As part of the phase 2 portion of MajesTEC-1, an additional 125 patients were administered the RP2D, for a total of 165 patients analyzed as per the data cutoff relevant to this report (March 16, 2022).

### ***Patients Receiving Treatments from Real-world Clinical Practice in LocoMMotion***

LocoMMotion (NCT04035226) is the first prospective, multinational, non-interventional study of therapies used in real-world physician's choice of therapy in patients with triple-class–exposed RRMM and was described elsewhere in detail [2]. A total of 76 centers from 9 European countries and the United States enrolled a total of 248 patients between August 2019 and October 2020. Response and progression events were assessed by a response review committee. The data used for analyses in this study included data from LocoMMotion as of November 2, 2021, with a median duration of patient follow-up of 16.13 months.

### ***Analysis Populations and Design***

The intention-to-treat (ITT) populations in MajesTEC-1 and the RWPC cohort were considered analogous and were compared in the current analyses. The ITT population in MajesTEC-1 included all participants who were treated with teclistamab, with the index date defined as the date of first dose. The ITT population in the RWPC cohort consisted of all participants who satisfied the eligibility criteria, with the index date defined as day 1 cycle 1 of the real-life standard of care treatment.

**Fig. S1** Propensity score distributions (A) and standardized mean difference plots (B). Main analysis adjusted for refractory status, ISS stage, time to progression on last regimen, extramedullary plasmacytomas, number of previous LOTs, years since MM diagnosis, average duration of previous lines, age, hemoglobin levels, LDH levels, creatinine clearance, ECOG PS, sex, type of MM, and previous hematopoietic stem cell transplant. *ATT* average treatment effect in the treated population, *ECOG PS* Eastern Cooperative Oncology Group performance status, *EMD* extramedullary disease, *ISS* International Staging System, *LDH* lactate dehydrogenase, *LOT* line of therapy, *MM* multiple myeloma, *PC* physician's choice

**(A) Distributional balance for unadjusted and ATT-adjusted analysis**

**Unadjusted**

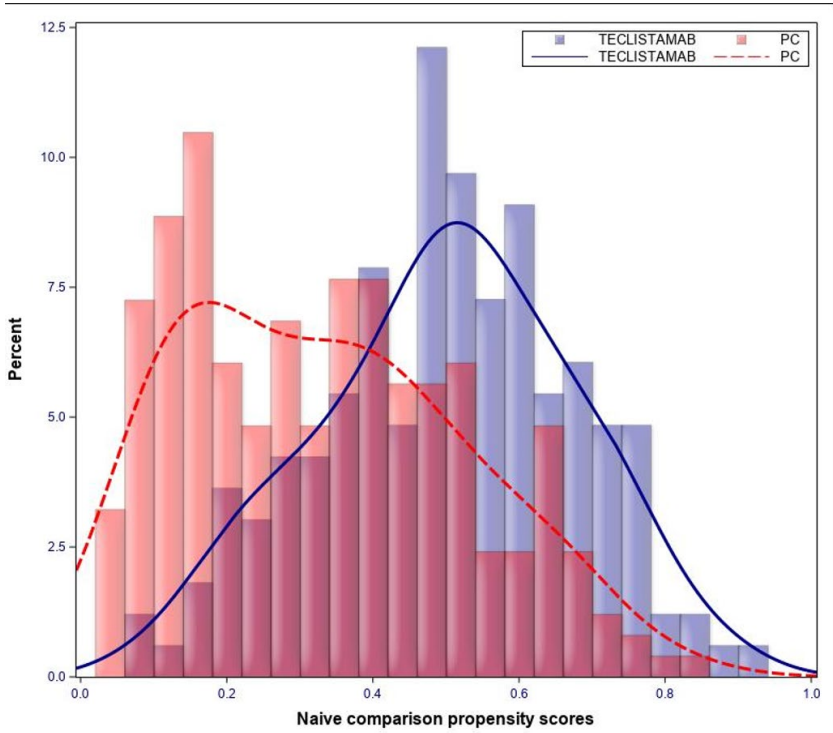

**ATT-Adjusted**

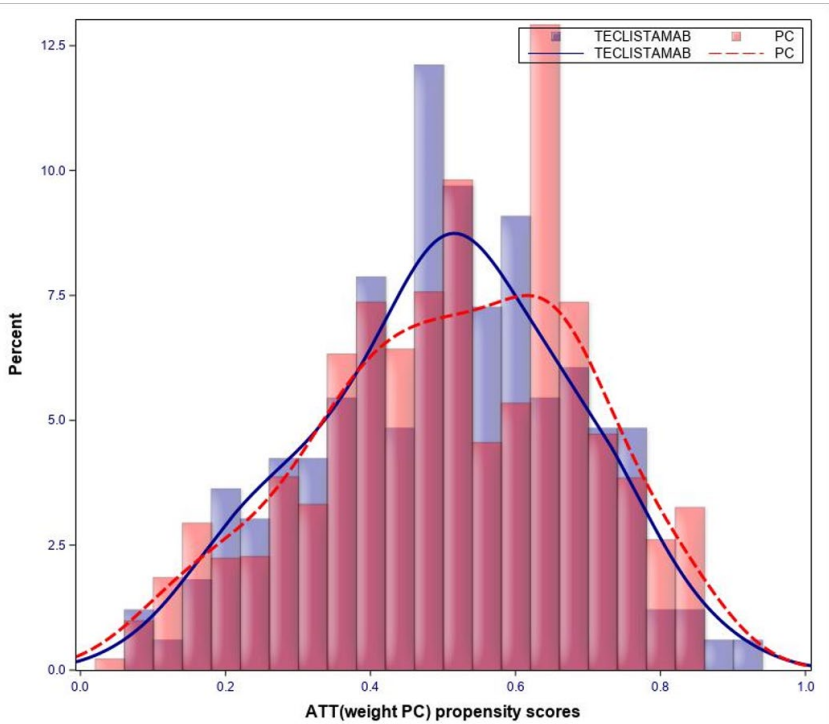

**(B) Standardized mean difference plots before and after ATT weighting**

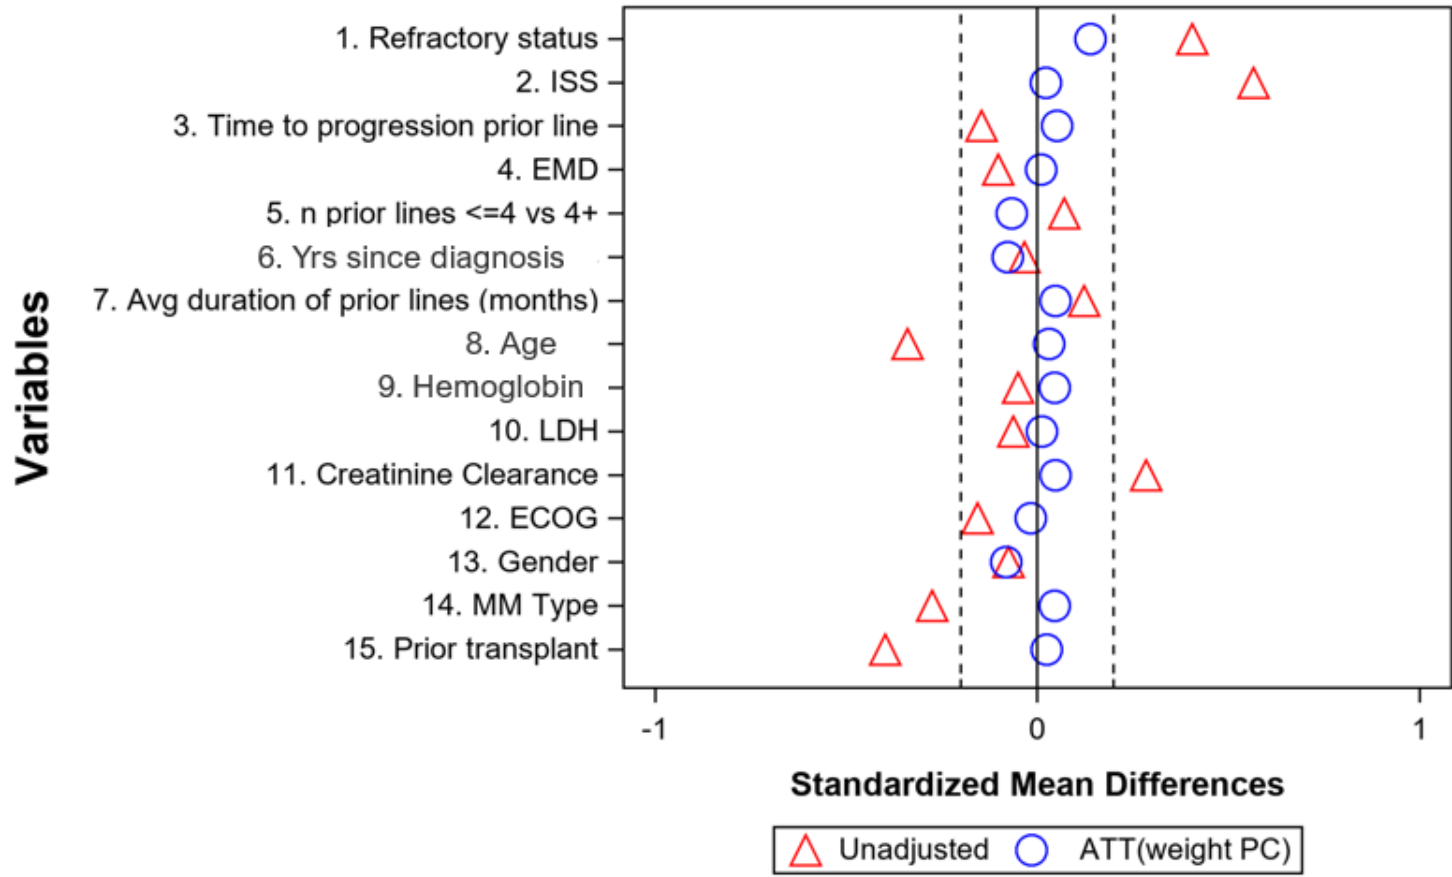

**Table S1** Ethics committees/Institutional Review Boards in LocoMMotion

| <b>Country</b> | <b>Ethics Committee/ Institutional Review Board address</b>                                     | <b>Approval date</b> | <b>Ref #</b>                |
|----------------|-------------------------------------------------------------------------------------------------|----------------------|-----------------------------|
| US             | The James/ A054 Starling Loving Hall<br>320 W. 10th Ave, Columbus, OH 43210                     | 15 Nov 2019          | OSU-19288                   |
| US             | Columbia Research<br>615 West 131st St. 3rd floor, New York, NY 10027                           | 21 Nov 2019          | IRB-AAAS7369 or<br>7571412  |
| US             | Washington University in St. Louis<br>660 South Euclid Ave. Campus Box 8089, St. Louis MO 63110 | 19 Dec 2019          | 201912009                   |
| US             | Sterling IRB<br>6300 Powers Ferry Road Suite 600-351, Atlanta GA 30339                          | 10 Oct 2019          | IRB ID 7513-<br>PDEisenberg |
| US             | Sterling IRB<br>6300 Powers Ferry Road Suite 600-351, Atlanta GA 30339                          | 29 Oct 2019          | IRB ID 7513-<br>Amazumder   |
| US             | Sterling IRB<br>6300 Powers Ferry Road Suite 600-351, Atlanta GA 30339                          | 19 Nov 2019          | IRB ID 7513-<br>KSJahangir  |
| US             | Sterling IRB<br>6300 Powers Ferry Road Suite 600-351, Atlanta GA 30339                          | 21 Oct 2019          | IRB ID 7513-<br>MEBednar    |
| US             | Sterling IRB<br>6300 Powers Ferry Road Suite 600-351, Atlanta GA 30339                          | 13 Nov 2019          | IRB ID 7513-Cchen           |
| US             | Sterling IRB<br>6300 Powers Ferry Road Suite 600-351, Atlanta GA 30339                          | 3 Dec 2019           | IRB ID 7513-<br>DHuang      |



|         |                                                                                                                                                                     |             |                             |
|---------|---------------------------------------------------------------------------------------------------------------------------------------------------------------------|-------------|-----------------------------|
| US      | Sterling IRB<br>6300 Powers Ferry Road Suite 600-351, Atlanta GA 30339                                                                                              | 30 Sep 2019 | IRB ID 7513-Zmalik          |
| US      | Sterling IRB<br>6300 Powers Ferry Road Suite 600-351, Atlanta GA 30339                                                                                              | 30 Oct 2019 | IRB ID 7513-<br>Lshunyakov  |
| US      | Sterling IRB<br>6300 Powers Ferry Road Suite 600-351, Atlanta GA 30339                                                                                              | 21 Jan 2020 | IRB ID 7513-<br>Hterebolo   |
| US      | St. Francis Hospital The Heart Center                                                                                                                               | 5 Dec 2019  | IRB #19-34                  |
| US      | Sterling IRB<br>6300 Powers Ferry Road Suite 600-351, Atlanta GA 30339                                                                                              | 4 Dec 2019  | IRB ID 7513-<br>RRCaradonna |
| US      | Sterling IRB<br>6300 Powers Ferry Road Suite 600-351, Atlanta GA 30339                                                                                              | 5 Nov 2019  | IRB ID 7513-Mbajaj          |
| Germany | EC Universiaet Heidelberg, Ethik-Kommission I der Medizinischen<br>Fakultät Heidelberg, Alte Glockengiesserei 11/1, 69115 Heidelberg                                | 16 Aug 2019 | S-549/2019                  |
| Germany | Tuebingen Ethik-Kommission an der Medizinischen Fakultät der Eberhard-Karls-<br>Universität und am Universitätsklinikum Tübingen<br>Gartenstraße 47, 72074 Tübingen | 16 Sep 2019 | 548/2019BO2                 |
| Germany | EC medizinische Hochschule Hannover Ethik-Kommission d. Medizinischen<br>Hochschule Hannover<br>Carl-Neuberger-Str. 1, 3623 Hannover                                | 20 Sep 2019 | 8672_B0_K_2019              |

|         |                                                                                                                                               |             |           |
|---------|-----------------------------------------------------------------------------------------------------------------------------------------------|-------------|-----------|
| Germany | EC Aertzekammer Hamburg Ethikkommission der Ärztekammer Hamburg;<br>Körperschaft des öffentlichen Rechts<br>Weidestr. 122b, 22083 Hamburg     | 21 Oct 2019 | PV7092    |
| Germany | EC Universitaet Wuerzburg<br>Josef-Schneider-Str. 4, Bau C15, 97080 Wuerzburg                                                                 | 17 Jan 2020 | 172/19-me |
| Germany | EC Universiaet Koeln Geschäftsstelle der ethik-kommission der medizinischen<br>fakultät der universität zu köln<br>Kerpenerstr 62, 50937 Köln | 18 Feb 2020 | 19-1545_1 |
| Spain   | Comité Coordinador de Ética de la Investigación Clínica de Andalucía<br>Avda. de la Innovación, s/n. Edificio Arena 1, 41080 Sevilla          | 2 Oct 2019  | N/A       |
| Spain   | Comité Coordinador de Ética de la Investigación Clínica de Andalucía<br>Avda. de la Innovación, s/n. Edificio Arena 1, 41080 Sevilla          | 7 Oct 2019  | N/A       |
| Spain   | Comité Coordinador de Ética de la Investigación Clínica de Andalucía<br>Avda. de la Innovación, s/n. Edificio Arena 1, 41080 Sevilla          | 7 Oct 2029  | N/A       |
| Spain   | Comité de Ética de la Investigación de Cadiz<br>Avda. Ana de Viya, 21, 11009 Cadiz                                                            | 23 Jul 2020 | N/A       |
| Spain   | Comité Coordinador de Ética de la Investigación Clínica de Andalucía<br>Avda. de la Innovación, s/n. Edificio Arena 1, 41080 Sevilla          | 30 Jul 2020 | N/A       |

|       |                                                                                                                                                                  |             |               |
|-------|------------------------------------------------------------------------------------------------------------------------------------------------------------------|-------------|---------------|
| UK    | Tayside medical science centre<br>Residency block level 3, George Pirie way, Ninewells hospital and medical school, Dundee, DD1 9SY                              | 29 Jul 2019 | DL/19/ES/0088 |
| Italy | Comitato Etico<br>Area 3 ASL Lecce, Via Miglietta 5,73100                                                                                                        | 19 Sep 2019 | CE150036      |
| Italy | Comitato Etico Regione Liguria<br>Largo Rosanna Benzi 10, 16132 Genova                                                                                           | 24 Jan 2020 | CE150193      |
| Italy | Comitato etico dell'IRCCS casa sollievo della sofferenza di s. giovanni rotondo<br>Viale Cappuccini, 71013 SGR                                                   | 17 Jul 2019 | CE150037      |
| Italy | Comitato Etico Indipendente Azienda Ospedaliera Universitaria Policlinico S. Orsola-Malpighi di Bologna<br>Via Albertoni 15, 40138 Bologna                       | 3 Oct 2019  | CE150192      |
| Italy | Comitato Etico della Fondazione Policlinico Universitario Agostino Gemelli<br>IRCCS Università Cattolica del Sacro Cuore<br>Largo Agostino Gemelli 8, 00168 Roma | 22 Jul 2019 | CE150057      |
| Italy | Comitato Etico Catania 1 c/o AOU Policlinico Vittorio Emanuele<br>Via Santa Sofia 78, Catania                                                                    | 30 Oct 2019 | CE150101      |
| Italy | Comitato Etico "La Sapienza" Azienda Policlinico Umberto I<br>Via Del Policlinico 155, 00161 Roma                                                                | 24 Sep 2019 | CE150031      |

|       |                                                                                                                                         |             |          |
|-------|-----------------------------------------------------------------------------------------------------------------------------------------|-------------|----------|
| Italy | Comitato Etico interaziendale aou citta' della salute e della scienza di Torino<br>Corso Bramante 88/90, 10126 Torino                   | 25 Oct 2019 | CE150115 |
| Italy | CESC della Provincia di Padova<br>Via Giustininani 1, 35128 Padova                                                                      | 25 Jun 2020 | CE150028 |
| Italy | Comitato Etico Palermo 2 IRB-EC<br>Viale Strasburgo 233, 90136 Palermo                                                                  | 14 Oct 2019 | CE150125 |
| Italy | Comitato etico referente per l'area di Pavia<br>Viale Golgi 19, 27100 Pavia                                                             | 5 Sep 2019  | CE150183 |
| Italy | Comitato Etico Unico Regionale per la Basilicata IRB-EC<br>Via Potito Petrone 1, 85100 Potenza                                          | 16 Oct 2019 | CE150051 |
| Italy | Comitato Etico Interregionale c/o A.O.U. Policlinico Consorziiale<br>Piazza Giulio Cesare 11, 70124 Bari                                | 8 Oct 2019  | CE150162 |
| Italy | Comitato Etico IRCCS Istituto Tumori "Giovanni Paolo II"<br>Viale orazio flacco 65, 70124 Bari                                          | 23 Apr 2020 | CE150168 |
| Italy | Comitato Etico della Romagna CEROM<br>Via Piero Maroncelli 40, 47014 Meldola                                                            | 8 May 2020  | CE150190 |
| Italy | Comitato Etico Regione Toscana - Area Vasta Centro c/o Azienda Ospedaliera<br>Universitaria Careggi<br>Largo Brambilla 3, 50134 Firenze | 11 May 2020 | CE150071 |

|                 |                                                                                                                                                                     |             |                                  |
|-----------------|---------------------------------------------------------------------------------------------------------------------------------------------------------------------|-------------|----------------------------------|
| Belgium         | Etische Commissie, Onderzoek UZ/KU Leuven<br>Herestraat 49, 3000 Leuven                                                                                             | 13 Sep 2019 | S62984                           |
| The Netherlands | METC van de stichting BEBO<br>Dr. Nassaulaan 10, 9401 HK Assen                                                                                                      | 16 Jul 2019 | 19.084/IH                        |
| Poland          | Komisja Bioetyczna przy, Uniwersytecie Medycznym im. Karola<br>Marcinkowskiego w Poznaniu, Collegium Maius<br>Dział Badań Naukowych; ul. Bukowska 70, 60-812 Poznań | 07 Nov 2019 | 991/19                           |
| France          | CPP EST III, Hopital de Brabois<br>Rue du Morvan, 54511 Vandoeuvre-les-Nancy Cedex                                                                                  | 5 Sep 2019  | Numéro ID RCB:<br>2019-A01716-51 |
| Russia          | Independent Interdisciplinary Committee on Ethics Expertise of Clinical Trials,<br>51 Leningradskiy prospect, 125468 Moscow                                         | 4 Oct 2019  | 15                               |

---

**Table S2** Ethics committees/Institutional Review Boards in MajesTEC-1

| <b>Country</b> | <b>Ethics Committee/ Institutional Review Board address</b>                                                                                                     | <b>Approval date</b> |
|----------------|-----------------------------------------------------------------------------------------------------------------------------------------------------------------|----------------------|
| Belgium        | Ethische Commissie Onderzoek UZ/KU Leuven<br>Campus Gasthuisberg, Herestraat 49 Leuven 3000                                                                     | 21 Dec 2020          |
| Belgium        | Commissie voor Medische Ethiek UZ Gent<br>2de verdieping (gebouw 75), C. Heymanslaan 10 Gent 9000                                                               | 21 Dec 2020          |
| Canada         | Health Research Ethics Board of Alberta Clinical Trials Committee<br>1500,10104 - 103 Avenue NW Edmonton, Alberta, T5J 0H8                                      | 24 Nov 2020          |
| Canada         | UHN Research Ethics Board<br>700 University Ave, 10 <sup>th</sup> Floor, Room 10-56 Toronto, ON, M5G 1Z5                                                        | 19 Nov 2020          |
| Canada         | McGill University Health Centre (MUHC) Centre for Applied Ethics<br>5100 boul de Maisonneuve Ouest, 5 <sup>th</sup> floor Office 576, Montreal, Quebec H4A 3T2  | 06 Jan 2021          |
| Canada         | Health Research Ethics Board of Alberta Clinical Trials Committee<br>1500, 10104 – 103 Avenue NW, Edmonton, Alberta T5J 0H8                                     | 26 Nov 2020          |
| France         | Comité de protection des personnes OUEST III C.H.U. La Milétrie –<br>Pavillon Administratif - Porte 213, 2 rue de la milétrie – CS 90 577, POITIERS CEDEX 86021 | 14 Nov 2019          |
| France         | CPP Ouest III<br>Bat. Vie La Sante – 1er etage porte 101, CHU de Poitiers, 2 rue de la miletrie Poitiers Cedex 86021                                            | 12 Oct 2020          |

|             |                                                                                                                                                         |             |
|-------------|---------------------------------------------------------------------------------------------------------------------------------------------------------|-------------|
| Germany     | Ethik-Kommission an der Medizinischen Fakultät der Eberhard-Karls-Universität und am<br>Universitätsklinikum Tübingen<br>Gartenstraße 47 Tübingen 72074 | 11 Nov 2020 |
| Germany     | Ethik-Kommission der Medizinischen Fakultät Würzburg, Institut für Pharmakologie<br>Versbacher Str. 9 Würzburg 97078                                    | 11 Nov 2020 |
| Germany     | Ethik-Kommission an der Medizinischen Fakultät der Universität Leipzig<br>Käthe-Kollwitz-Straße 82, Haus: Karl-Sudhoff-Institut Leipzig, Saxony, 04109  | 11 Nov 2020 |
| Italy       | Comitato Etico Area Vasta Emilia Centro regione Emilia-Romagna, c/o A.O.U. Policlinico S.Orsola<br>Malpighi<br>Via Albertoni 15 Bologna 40138           | 11 Jan 2021 |
| Italy       | Comitato Etico della Provincia di Bergamo Azienda Ospedaliera Papa Giovanni XXIII<br>Piazza OMS, 1 BERGAMO 24127                                        | 07 Dec 2020 |
| Italy       | COMITATO ETICO INDIPENDENTE DELLA FONDAZIONE IRCCS ISTITUTO NAZIONALE DEI<br>TUMORI DI MILANO<br>Via Giacomo Venezian, 1, Milano 20133                  | 13 Jan 2021 |
| Netherlands | METC Vrije Universiteit Medisch Centrum, Amsterdam<br>De Boelelaan 1117 Amsterdam, 1081 HV                                                              | 27 Sep 2018 |
| Netherlands | METC Vrije Universiteit Medisch Centrum, Amsterdam<br>De Boelelaan 1117 Amsterdam, 1081 HV                                                              | 21 Dec 2021 |

|        |                                                                                                                                            |             |
|--------|--------------------------------------------------------------------------------------------------------------------------------------------|-------------|
| Spain  | Comité Ético de Investigación Clínica de Navarra, Departamento de Salud<br>Pabellón de Docencia, C/ Irunlarrea, 3, Pamplona, 31008         | 10 May 2017 |
| Spain  | HOSPITAL DE NAVARRA - CEIC DE NAVARRA<br>Calle Irunlarrea 3, Departamento de Salud (pabellón de Docencia) Pamplona, NAVARRA, 31008         | 07 Sep 2020 |
| Sweden | Etikprövningsmyndigheten, Box 2110, Uppsala, 75002                                                                                         | 28 Aug 2017 |
| Sweden | Etikprövningsmyndigheten, Box 2110, Uppsala, 75002                                                                                         | 17 Aug 2020 |
| UK     | University College London Hospitals NHS Foundation Trust<br>235 Euston Road, Bloomsbury London NW1 2BU                                     | 23 Nov 2020 |
| UK     | South Central Hampshire B Research Ethics, National Research Ethics Service<br>Level 3, Block B, Whitefrairs, Lewins Mead, Bristol BS1 2NT | 23 Nov 2020 |
| UK     | South Central Hampshire B Research Ethics, National Research Ethics Service<br>Level 3, Block B, Whitefrairs, Lewins Mead, Bristol BS1 2NT | 12 May 2021 |
| UK     | South Central Hampshire B Research Ethics, National Research Ethics Service<br>Level 3, Block B, Whitefrairs, Lewins Mead, Bristol BS1 2NT | 21 Dec 2020 |
| UK     | Health Research Authority<br>2 Redman Place, Stratford London E20 1JQ                                                                      | 23 Nov 2020 |
| UK     | Health Research Authority<br>2 Redman Place, Stratford London E20 1JQ                                                                      | 12 May 2021 |



|     |                                                                                                                                     |             |
|-----|-------------------------------------------------------------------------------------------------------------------------------------|-------------|
| UK  | Health Research Authority<br>2 Redman Place, Stratford London E20 1JQ                                                               | 21 Dec 2020 |
| UK  | Southampton General Hospital<br>Tremona Rd Southampton, Southampton, SO16 6YD                                                       | 12 May 2021 |
| UK  | Royal Marsden Hospital- R+D<br>Fulham Road London, London, SW3 6JJ                                                                  | 21 Dec 2020 |
| USA | Advarra<br>6100 Merriweather Dr., Suite 600, Columbia, MD, 21044                                                                    | 03 May 2017 |
| USA | Advarra<br>6100 Merriweather Dr., Suite 600, Columbia, MD, 21044                                                                    | 18 Dec 2020 |
| USA | Icahn School of Medicine at Mount Sinai Program for the Protection of Human Subjects IRB<br>One Gustave L. Levy Place NY, NY, 10029 | 21 Nov 2017 |
| USA | Icahn School of Medicine at Mount Sinai Program for the Protection of Human Subjects IRB<br>One Gustave L. Levy Place NY, NY, 10029 | 19 Oct 2020 |
| USA | University of Pennsylvania Institutional Review Board<br>3800 Spruce Street, First Floor Suite 151 Philadelphia, PA 19104           | 20 Dec 2017 |
| USA | University of Pennsylvania Institutional Review Board<br>3800 Spruce Street, First Floor Suite 151 Philadelphia, PA 19104           | 30 Sep 2020 |
| USA | WCG IRB<br>1019 39th Avenue SE Puyallup, WA, 98374                                                                                  | 01 Jun 2017 |

|     |                                                                                                             |             |
|-----|-------------------------------------------------------------------------------------------------------------|-------------|
| USA | WCG IRB<br>1019 39th Avenue SE, Suite 120 Puyallup, WA, 98374                                               | 22 Jul 2022 |
| USA | Western Institutional Review Board<br>1019 39th Avenue SE, Suite 120 Puyallup, WA, 98374                    | 21 Sep 2020 |
| USA | WIRB<br>1019 39th Ave SE #120, Puyallup, WA, 98374                                                          | 24 Dec 2020 |
| USA | Emory University IRB<br>1599 Clifton Road NE, 5 <sup>th</sup> Floor Atlanta, GA 30322                       | 17 Nov 2020 |
| USA | WIRB<br>1019 39th Ave SE #120, Puyallup, WA, 98374                                                          | 27 Dec 2020 |
| USA | WIRB<br>1019 39th Ave SE #120 Puyallup, WA, 98374                                                           | 30 Dec 2020 |
| USA | Stanford University IRB<br>3000 El Camino Real Five Palo Alto Sq, 4 <sup>th</sup> Floor Palo Alto, CA 93406 | 13 Oct 2020 |

---

**Table S3** Treatment regimens, LocoMMotion cohort

| <b>Treatment regimen</b>                    | <b>Frequency (%)</b> |
|---------------------------------------------|----------------------|
| Carfilzomib-dexamethasone                   | 34 (13.7)            |
| Cyclophosphamide-dexamethasone-pomalidomide | 34 (13.7)            |
| Dexamethasone-pomalidomide                  | 29 (11.7)            |
| Dexamethasone-ixazomib-lenalidomide         | 15 (6.0)             |
| Bortezomib-dexamethasone-panobinostat       | 11 (4.4)             |
| Bendamustine-bortezomib-dexamethasone       | 7 (2.8)              |
| Carfilzomib-cyclophosphamide-dexamethasone  | 7 (2.8)              |
| Dexamethasone-elotuzumab-pomalidomide       | 6 (2.4)              |
| Dexamethasone-lenalidomide                  | 6 (2.4)              |
| Bortezomib-dexamethasone-doxorubicin        | 5 (2.0)              |
| Carfilzomib-dexamethasone-lenalidomide      | 5 (2.0)              |
| Carfilzomib-dexamethasone-pomalidomide      | 5 (2.0)              |
| Melphalan                                   | 5 (2.0)              |
| Belantamab mafodotin                        | 4 (1.6)              |
| Bendamustine-prednisone                     | 4 (1.6)              |
| Cyclophosphamide-dexamethasone              | 4 (1.6)              |

Regimens prescribed to < 4 patients not shown. Participants (*N* = 248) can be counted in > 1 regimen or combination if they have received > 1 combination in their treatment before progression or death

## References

1. Moreau P, Garfall AL, van de Donk NWCJ, et al. Teclistamab in relapsed or refractory multiple myeloma. *N Engl J Med*. 2022;387:495–505.
2. Mateos M-V, Weisel K, De Stefano V, et al. LocoMMotion: a prospective, non-interventional, multinational study of real-life current standards of care in patients with relapsed and/or refractory multiple myeloma. *Leukemia*. 2022;36:1371–6.
